# Supplementary material for: Novel celastrol derivatives inhibit the growth of hepatocellular carcinoma patient-derived xenografts
Source: PubMed Central journal article supplement (PMC4170594; doi:10.18632/oncotarget.2171), 2014-07-10
Supplement: oncotarget-05-5819-s001.pdf [file oncotarget-05-5819-s001.pdf]

# Novel celastrol derivatives inhibit the growth of hepatocellular carcinoma patient-derived xenografts

## Supplementary Material

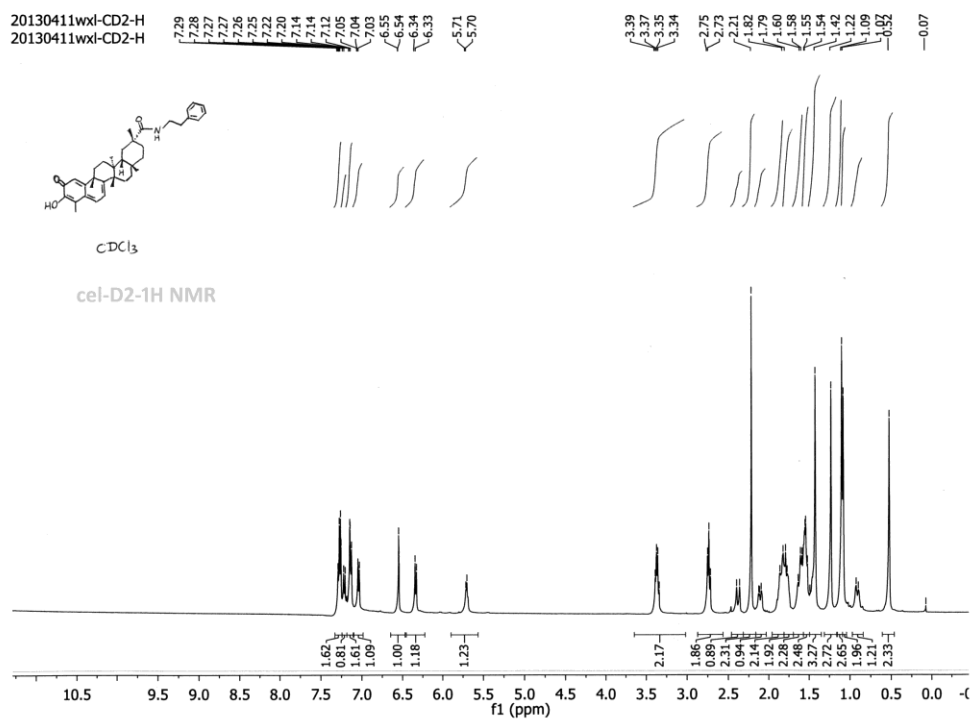

Supplementary Fig. 1: <sup>1</sup>H NMR data for cel-D2.

wxl20130414CD7-H  
wxl20130414CD7-H

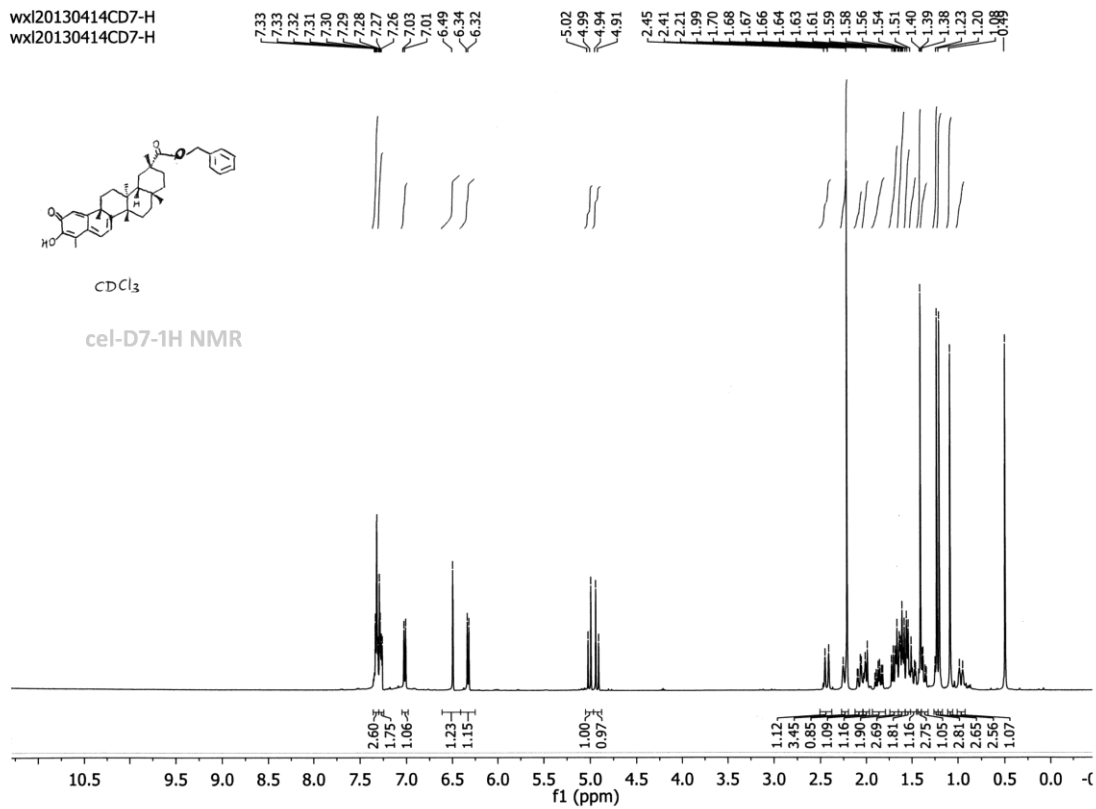

Supplementary Fig. 2: <sup>1</sup>H NMR data for cel-D7.

20130411wxl-CD2-C  
20130411wxl-CD2-C

178.29  
177.94  
171.13  
165.08

146.20  
139.07  
134.66  
128.93  
128.90  
127.59  
126.80  
119.67  
118.28  
117.59

45.30  
44.51  
43.35  
40.88  
40.53  
39.57  
38.41  
36.55  
35.40  
35.08  
33.93  
33.74  
31.80  
31.26  
30.98  
30.32  
29.60  
28.83  
21.92  
18.52  
10.54

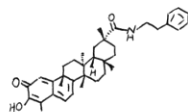

CDCl<sub>3</sub>

cel-D2-13C NMR

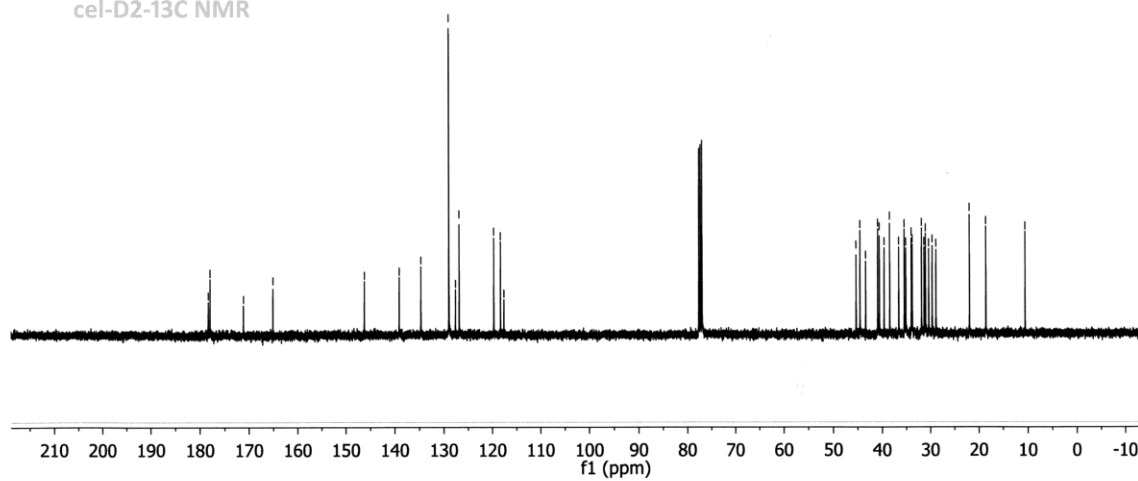

Supplementary Fig. 3: <sup>13</sup>C NMR data for cel-D2.

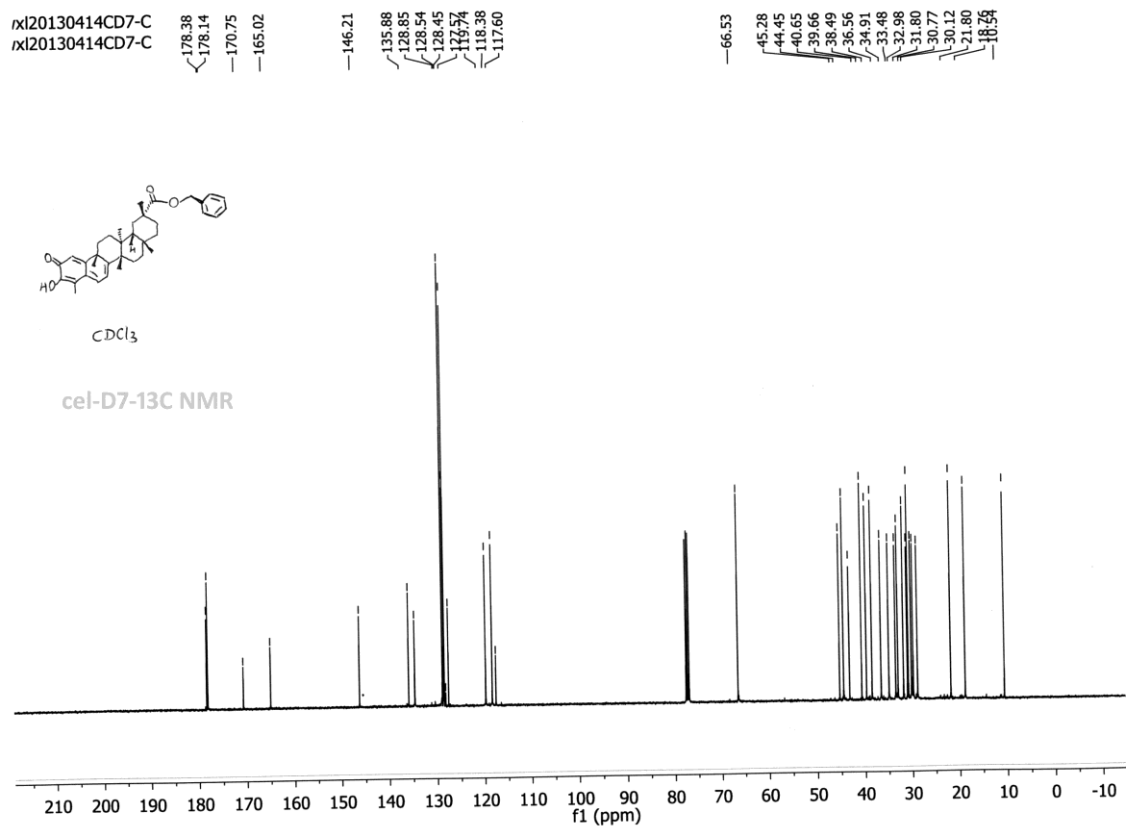

Supplementary Fig. 4:  $^{13}\text{C}$  NMR data for cel-D7.

# Mass Spectrum SmartFormula Report

**Analysis Info**

|               |                                                          |                   |                      |
|---------------|----------------------------------------------------------|-------------------|----------------------|
| Analysis Name | D:\Data\HRAM\130415\data\WangX_41769_CD2_02_92_01_6857.d | Acquisition Date  | 4/15/2013 2:10:28 PM |
| Method        | loopinj_pos_50_1200.m                                    | Operator          | BDAL@DE              |
| Sample Name   | WangX_41769_CD2_02                                       | Instrument / Ser# | micrOTOF-Q II 10292  |
| Comment       |                                                          |                   |                      |

**Acquisition Parameter**

|             |            |                       |           |                  |           |
|-------------|------------|-----------------------|-----------|------------------|-----------|
| Source Type | ESI        | Ion Polarity          | Positive  | Set Nebulizer    | 2.5 Bar   |
| Focus       | Not active | Set Capillary         | 4500 V    | Set Dry Heater   | 250 °C    |
| Scan Begin  | 50 m/z     | Set End Plate Offset  | -500 V    | Set Dry Gas      | 8.0 l/min |
| Scan End    | 1200 m/z   | Set Collision Cell RF | 100.0 Vpp | Set Divert Valve | Source    |

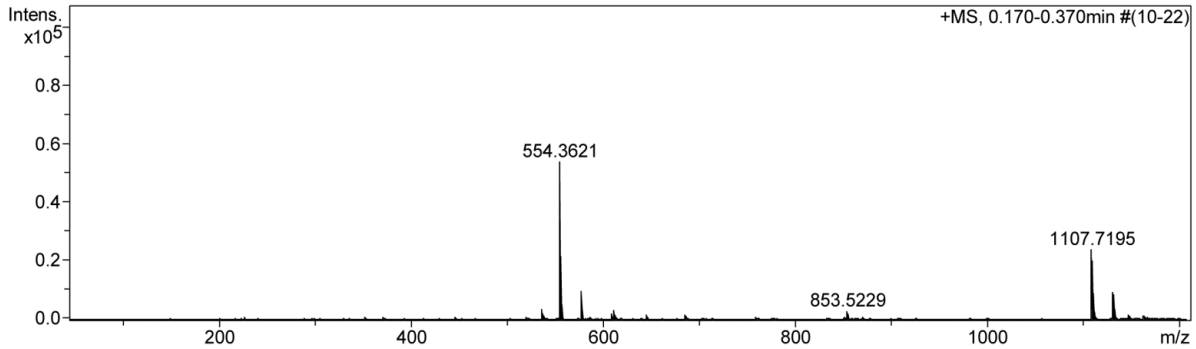

| Meas. m/z | # | Formula               | m/z      | mSigma | err [ppm] | Score  | err [mDa] | rdb  | e <sup>-</sup> Conf | N-Rule |
|-----------|---|-----------------------|----------|--------|-----------|--------|-----------|------|---------------------|--------|
| 554.3621  | 1 | C 37 H 48 N O 3       | 554.3629 | 4.9    | 1.4       | 100.00 | 0.8       | 14.5 | even                | ok     |
|           | 2 | C 35 H 49 N Na O 3    | 554.3605 | 11.2   | -2.9      | 54.10  | -1.6      | 11.5 | even                | ok     |
|           | 3 | C 33 H 44 N 7 O       | 554.3602 | 13.9   | -3.4      | 42.09  | -1.9      | 15.5 | even                | ok     |
|           | 4 | C 24 H 49 N 7 Na O 6  | 554.3637 | 69.1   | 2.8       | 11.27  | 1.6       | 3.5  | even                | ok     |
|           | 5 | C 21 H 41 N 17 Na     | 554.3623 | 70.1   | 0.4       | 22.93  | 0.2       | 9.5  | even                | ok     |
|           | 6 | C 22 H 44 N 13 O 4    | 554.3634 | 70.2   | 2.3       | 13.02  | 1.3       | 7.5  | even                | ok     |
|           | 7 | C 21 H 48 N 9 O 8     | 554.3620 | 72.6   | -0.1      | 22.60  | -0.0      | 2.5  | even                | ok     |
|           | 8 | C 20 H 45 N 13 Na O 4 | 554.3610 | 83.0   | -2.0      | 8.80   | -1.1      | 4.5  | even                | ok     |
|           | 9 | C 18 H 40 N 19 O 2    | 554.3607 | 84.1   | -2.5      | 7.05   | -1.4      | 8.5  | even                | ok     |

**Supplementary Fig. 5: High resolution mass spectrometry data for cel-D2.**

# Mass Spectrum SmartFormula Report

## Analysis Info

|               |                                                          |                   |                      |
|---------------|----------------------------------------------------------|-------------------|----------------------|
| Analysis Name | D:\Data\HRAM\130415\data\WangX_41769_CD7_02_93_01_6858.d | Acquisition Date  | 4/15/2013 2:14:25 PM |
| Method        | loopinj_pos_50_1200.m                                    | Operator          | BDAL@DE              |
| Sample Name   | WangX_41769_CD7_02                                       | Instrument / Ser# | micrOTOF-Q II 10292  |
| Comment       |                                                          |                   |                      |

## Acquisition Parameter

|             |            |                       |           |                  |           |
|-------------|------------|-----------------------|-----------|------------------|-----------|
| Source Type | ESI        | Ion Polarity          | Positive  | Set Nebulizer    | 2.5 Bar   |
| Focus       | Not active | Set Capillary         | 4500 V    | Set Dry Heater   | 250 °C    |
| Scan Begin  | 50 m/z     | Set End Plate Offset  | -500 V    | Set Dry Gas      | 8.0 l/min |
| Scan End    | 1200 m/z   | Set Collision Cell RF | 100.0 Vpp | Set Divert Valve | Source    |

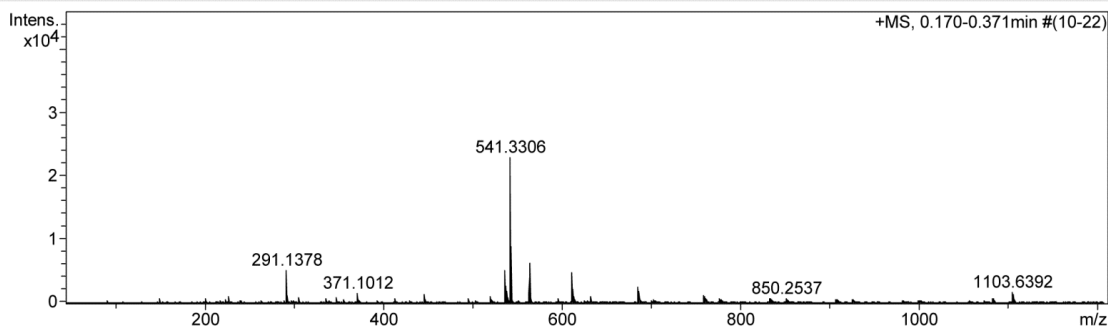

| Meas. m/z | #  | Formula               | m/z      | mSigma | err [ppm] | Score  | err [mDa] | rdb  | e <sup>-</sup> Conf | N-Rule |
|-----------|----|-----------------------|----------|--------|-----------|--------|-----------|------|---------------------|--------|
| 541.3306  | 1  | C 36 H 45 O 4         | 541.3312 | 5.9    | 1.2       | 98.61  | 0.6       | 14.5 | even                | ok     |
|           | 2  | C 35 H 42 N 4 Na      | 541.3302 | 10.0   | -0.8      | 100.00 | -0.4      | 16.5 | even                | ok     |
|           | 3  | C 34 H 46 Na O 4      | 541.3288 | 11.1   | -3.3      | 44.36  | -1.8      | 11.5 | even                | ok     |
|           | 4  | C 32 H 41 N 6 O 2     | 541.3286 | 12.9   | -3.8      | 34.73  | -2.1      | 15.5 | even                | ok     |
|           | 5  | C 37 H 41 N 4         | 541.3326 | 16.9   | 3.6       | 34.66  | 2.0       | 19.5 | even                | ok     |
|           | 6  | C 23 H 46 N 6 Na O 7  | 541.3320 | 59.3   | 2.6       | 16.37  | 1.4       | 3.5  | even                | ok     |
|           | 7  | C 21 H 41 N 12 O 5    | 541.3317 | 69.2   | 2.1       | 13.74  | 1.1       | 7.5  | even                | ok     |
|           | 8  | C 20 H 38 N 16 Na O   | 541.3307 | 69.8   | 0.1       | 22.92  | 0.1       | 9.5  | even                | ok     |
|           | 9  | C 20 H 45 N 8 O 9     | 541.3304 | 71.6   | -0.4      | 20.12  | -0.2      | 2.5  | even                | ok     |
|           | 10 | C 19 H 42 N 12 Na O 5 | 541.3293 | 82.0   | -2.4      | 7.62   | -1.3      | 4.5  | even                | ok     |
|           | 11 | C 17 H 37 N 18 O 3    | 541.3291 | 83.1   | -2.9      | 6.05   | -1.6      | 8.5  | even                | ok     |

**Supplementary Fig. 6: High resolution mass spectrometry data for cel-D7.**

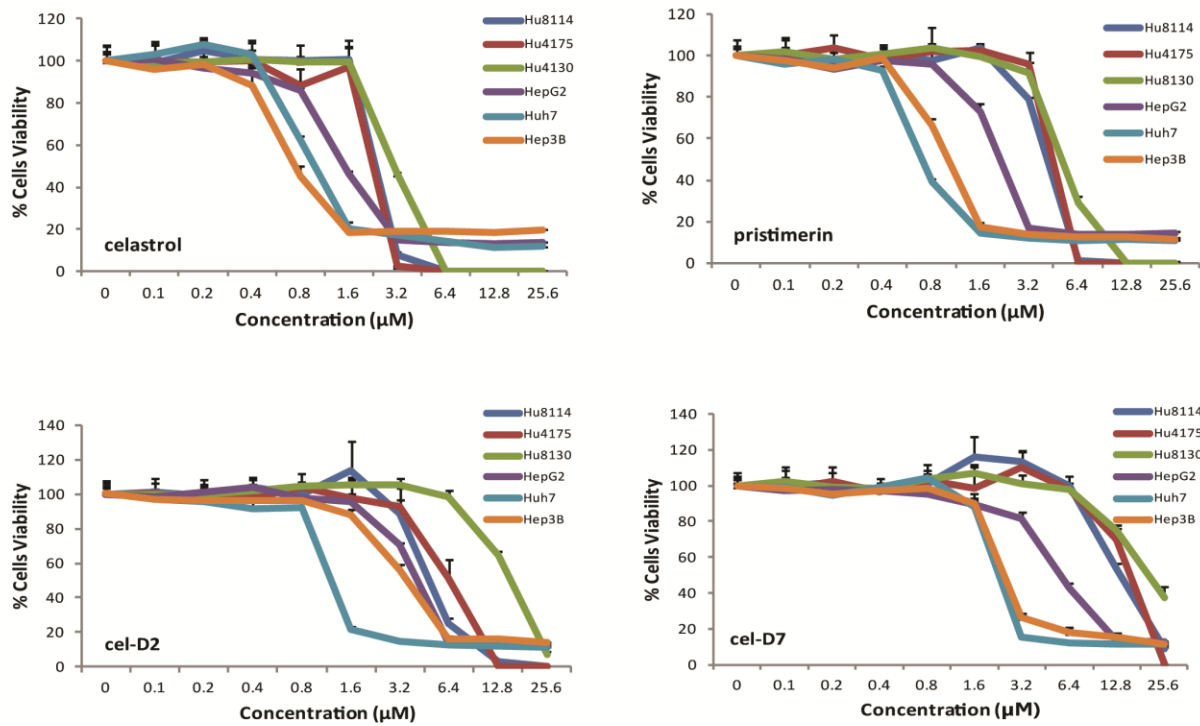

**Supplementary Fig. 7: Celastrol and its derivatives preferentially inhibited viability of HCC cells compared to normal hepatocytes.** Cell viability assays based on ATP release were used to determine the cytotoxicity of celastrol and its derivatives on three human HCC cell lines cells (HepG2, Huh7, and Hep3B) and normal hepatocytes (Hu8114, Hu4175, and Hu8130) following 72 hours of treatment. Results are presented as mean  $\pm$  SD (error bars). Relative ATP activity is proportional to the number of viable cells. The values of luciferase activity were normalized and compared with the DMSO control value, which was set at 100% cell viability. Three independent experiments were done, each in triplicates.

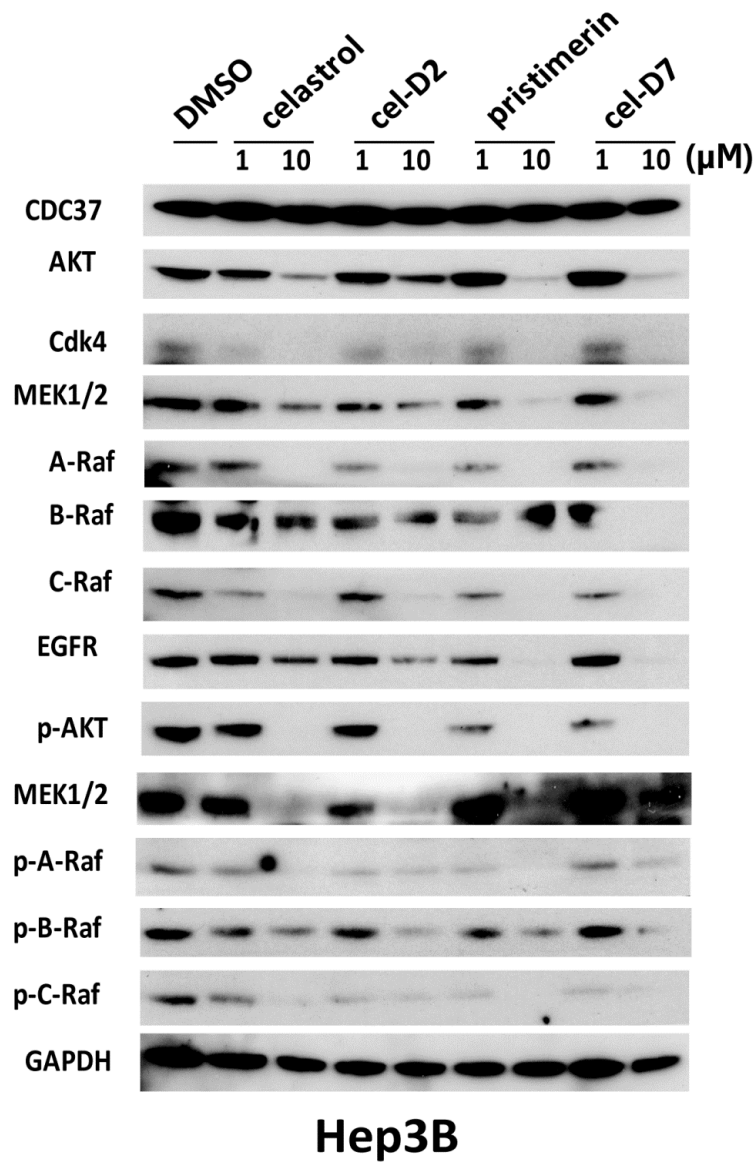

**Supplementary Fig. 8: Celastrol and its derivatives induced degradation and inhibited phosphorylation of HSP90/CDC37 protein kinases in Hep3B cells.** Hep3B cells were incubated for 6 hours with the compounds (1 or 10 μM) and CDC37, HSP90/CDC37 client proteins and GAPDH protein (loading control) levels were determined by Western blotting using specific antibodies.



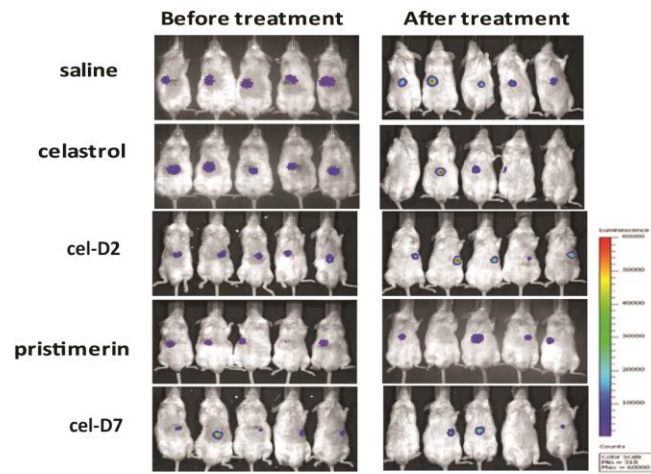

HCC-1

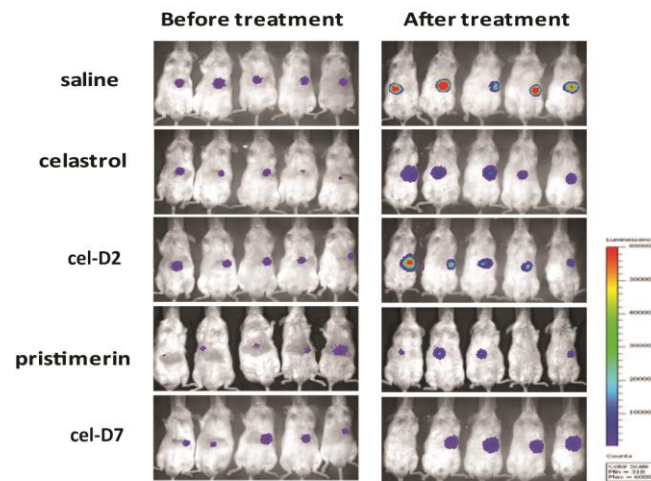

HCC-2

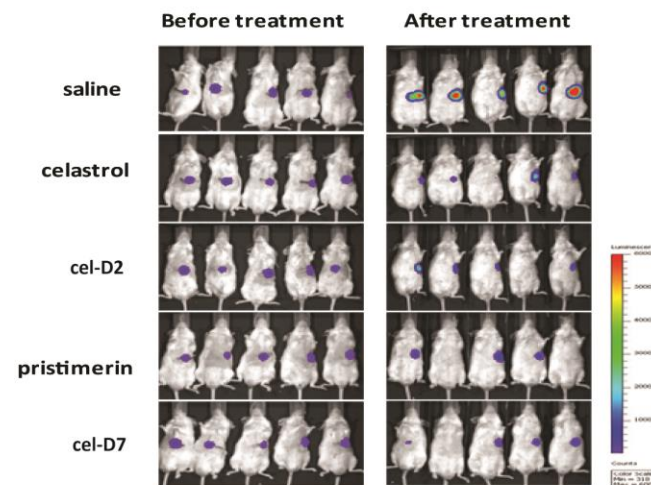

HCC-3

**Supplementary Fig. 9: Bioluminescence images of three HCC patient-derived xenograft models are shown before treatment and after 3 weeks of treatment with celastrol or its derivatives. Orthotopic liver tumor models derived from human HCC patient specimens (HCC-1, HCC-2, HCC-3) expressing a trifusion**

reporter gene were given intravenous injection of celastrol or its derivatives, and the tumor growth was monitored weekly using the Xenogen IVIS 100 imaging system.

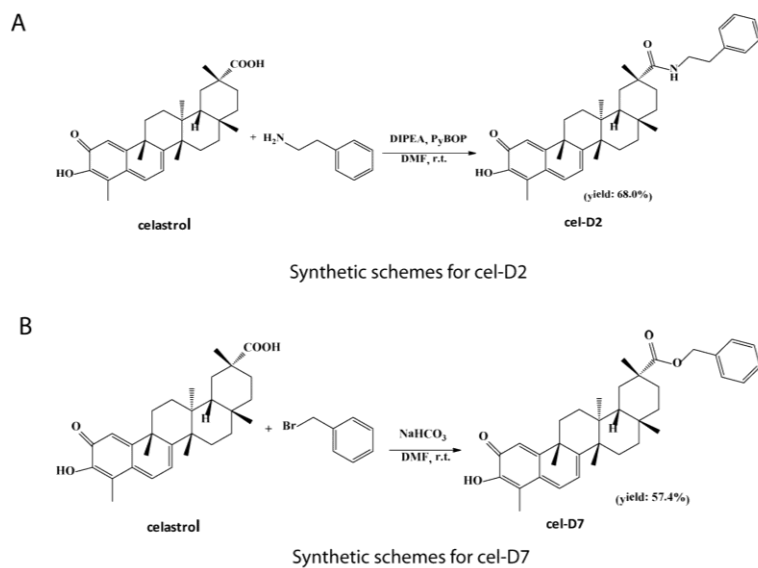

**Supplementary Fig. 10: Synthetic schemes for (A) cel-D2 and (B) cel-D7.**

**Supplementary Table 1: Structure and activity of celastrol and its derivatives**

| Compound  | 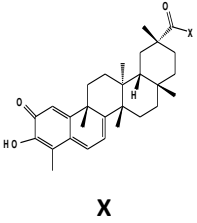 <p style="text-align: center;"><b>X</b></p> | IC <sub>50</sub> to HCC<br>cell lines (μM) | IC <sub>50</sub> to normal<br>hepatocytes (μM) |
|-----------|-------------------------------------------------------------------------------------------------------------------------------|--------------------------------------------|------------------------------------------------|
| celastrol |                                              | <b>0.3-1.22</b>                            | <b>2.06-3.08</b>                               |
| cel-D1    |                                              | <b>0.59-1.7</b>                            | <b>0.88-2.45</b>                               |
| cel-D2    |                                              | <b>1.04-3.58</b>                           | <b>5.9-16.8</b>                                |
| cel-D3    |                                              | <b>3.59-4.89</b>                           | <b>8.91-9.35</b>                               |
| cel-D4    |                                            | <b>3.13-4.67</b>                           | <b>4.19-7.1</b>                                |
| cel-D5    |                                            | <b>0.68-1.7</b>                            | <b>3.87-5.33</b>                               |
| cel-D6    |                                            | <b>0.44-1.19</b>                           | <b>2.03-3.19</b>                               |
| cel-D7    |                                            | <b>2.15-4.26</b>                           | <b>15.66-23.95</b>                             |

**Supplementary Table 2A: Characteristics of normal hepatocytes**

| <b>Lot</b> | <b>Age (y)</b> | <b>Gender</b> | <b>Race</b> | <b>Cell viability</b> |
|------------|----------------|---------------|-------------|-----------------------|
| Hu4175     | 3              | Male          | Caucasian   | 79%                   |
| Hu8114     | 47             | Female        | Caucasian   | 95%                   |
| Hu8130     | 18             | Female        | Caucasian   | 92%                   |

**Supplementary Table 2B: Characteristics of HCC patients**

|       | <b>Age (y)</b> | <b>Gender</b> | <b>Race</b> | <b>Virus</b> |
|-------|----------------|---------------|-------------|--------------|
| HCC-1 | 44             | Male          | Asian       | HBV          |
| HCC-2 | 75             | Male          | Caucasian   | None         |
| HCC-3 | 35             | Male          | Asian       | HBV          |

**Supplementary Table 3A: Selected organ weights after treatment in vivo**

| Organ       | saline     | celastrol          | pristimerin        | cel-D2     | cel-D7     |
|-------------|------------|--------------------|--------------------|------------|------------|
| Brain       | 0.41±0.03  | 0.4±0.01           | 0.39±0.02          | 0.42±0.01  | 0.41±0.01  |
| Heart       | 0.12±0.01  | 0.13±0.01          | 0.12±0.01          | 0.12±0.01  | 0.13±0.01  |
| Kidney      | 0.39±0.03  | 0.37±0.02          | 0.36±0.04          | 0.4±0.02   | 0.39±0.03  |
| Liver       | 1.1±0.06   | 1.14±0.07          | 0.98±0.09          | 1.13±0.09  | 1.05±0.13  |
| Lung        | 0.17±0.02  | 0.17±0.01          | 0.15±0.01          | 0.18±0.01  | 0.17±0.02  |
| Spleen      | 0.11±0.01  | <b>0.19±0.03*</b>  | 0.11±0.01          | 0.12±0.01  | 0.12±0.02  |
| Body weight | 24.17±0.73 | <b>21.42±0.81*</b> | <b>20.35±0.82*</b> | 23.85±1.43 | 22.83±0.97 |

Total body weights and selected organ weights of BALB/cJ mice (n=4/group) treated with different compounds.

Data represent mean ± SD. (\* p < 0.05%, compared to saline group.)

**Supplementary Table 3B: Selected toxicity results after treatment in vivo**

| Selected Parameters | saline     | celastrol          | pristimerin | cel-D2     | cel-D7     | Normal Range |
|---------------------|------------|--------------------|-------------|------------|------------|--------------|
| WBC (K/μL)          | 6.34±2.34  | <b>16.32±3.23*</b> | 4.26±1.49   | 4.04±2.09  | 4.49±2.21  | 3.2-12.8     |
| RBC (M/μL)          | 9.58±0.55  | 9.17±0.50          | 8.23±0.89   | 6.96±2.44  | 7.23±2.41  | 8.71-11.6    |
| HGB (g/dL)          | 14.83±0.49 | 13.96±0.39         | 12.70±1.36  | 11.10±3.03 | 11.98±2.35 | 13-17.2      |
| Albumin (g/dL)      | 2.78±0.24  | 2.78±0.05          | 2.93±0.28   | 2.56±0.15  | 2.55±0.13  | 2.5-2.9      |

|                               |             |             |                     |              |             |           |
|-------------------------------|-------------|-------------|---------------------|--------------|-------------|-----------|
| Creatine<br>(mg/dL)           | 0.35 ±0.10  | 0.45±0.06   | 0.15±0.06           | 0.28±0.09    | 0.38±0.10   | 0.25-0.47 |
| ALP(IU/L)                     | 89.25±29.92 | 48.75±4.50  | 103.8±26.52         | 78.00±19.70  | 92.50±9.68  | 82-172    |
| AST(U/L)                      | 201.8±60.07 | 169.0±94.63 | <b>804.8±753.8*</b> | 207.75±62.45 | 171.3±84.0  | 57-382    |
| ALT(U/L)                      | 145.0±63.69 | 85.75±68.09 | <b>475.8±266.4*</b> | 193.8±115.7  | 92.00±94.08 | 21-187    |
| Total<br>Bilirubin<br>(mg/dL) | 0.05 ±0.10  | 0.15±0.10   | 0.00±0.00           | 0.00±0.00    | 0.15±0.24   | 0.03-0.23 |
| Total protein<br>(g/dL)       | 5.55±0.68   | 5.70±0.00   | 5.35±0.34           | 5.13±0.17    | 4.85±0.17   | 4.4-5.9   |
| BUN<br>(mg/dL)                | 22.00±5.60  | 19.50±1.73  | 18.75±2.50          | 18.50±1.29   | 18.00±0.82  | 17-30     |

Representative toxicological data of BALB/cJ mice (n=4/group) treated with different compounds. WBC: white blood cells; RBC: red blood cells; HGB: hemoglobin; ALP: alkaline phosphatase; AST: aspartate aminotransferase; ALT: alanine aminotransferase; BUN: blood urea nitrogen. Data represent mean ± SD. (\* p < 0.05%, compared to saline group.)
